# Supplementary material for: Positive electrode–Li metal crosstalk behavior-induced morphology change of Li deposits
Source: Royal Society of Chemistry journal article supplement (doi:10.1039/d2ta03666e), 2022-01-01
Supplement: d2ta03666e2.pdf [file d2ta03666e2.pdf]

## Supplementary Information

### Positive electrode-Li metal crosstalk behavior-induced morphology change of Li deposits

Hyun-seung Kim<sup>a</sup>, Goojin Jeong<sup>a,†</sup>, Han Jun Leem<sup>a</sup>, Min A Lee<sup>a</sup>, Je-Nam Lee<sup>a</sup>,

Sang-Gil Woo<sup>a</sup>, Jisang Yu<sup>a,†</sup>

a. Advanced Batteries Research Center, Korea Electronics Technology Institute,

25, Saenari-ro, Seongnam 13509, Republic of Korea

<sup>†</sup> Corresponding author.

*E-mail address:* gjeong@keti.re.kr, jisang@keti.re.kr

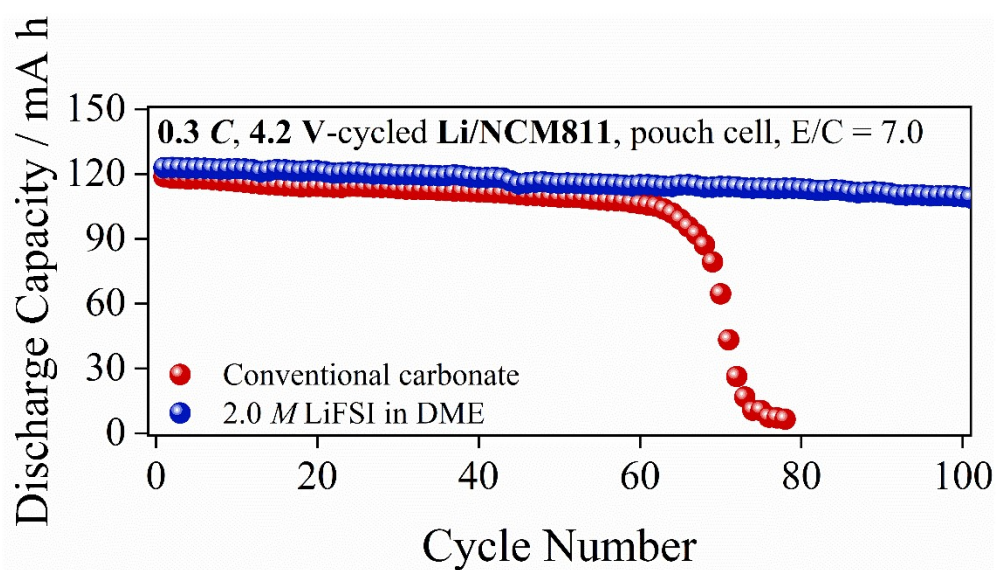

**Figure S1.** Li/NCM811 pouch cell evaluated with conventional carbonate electrolyte and 2.0 M LiFSI in DME electrolyte

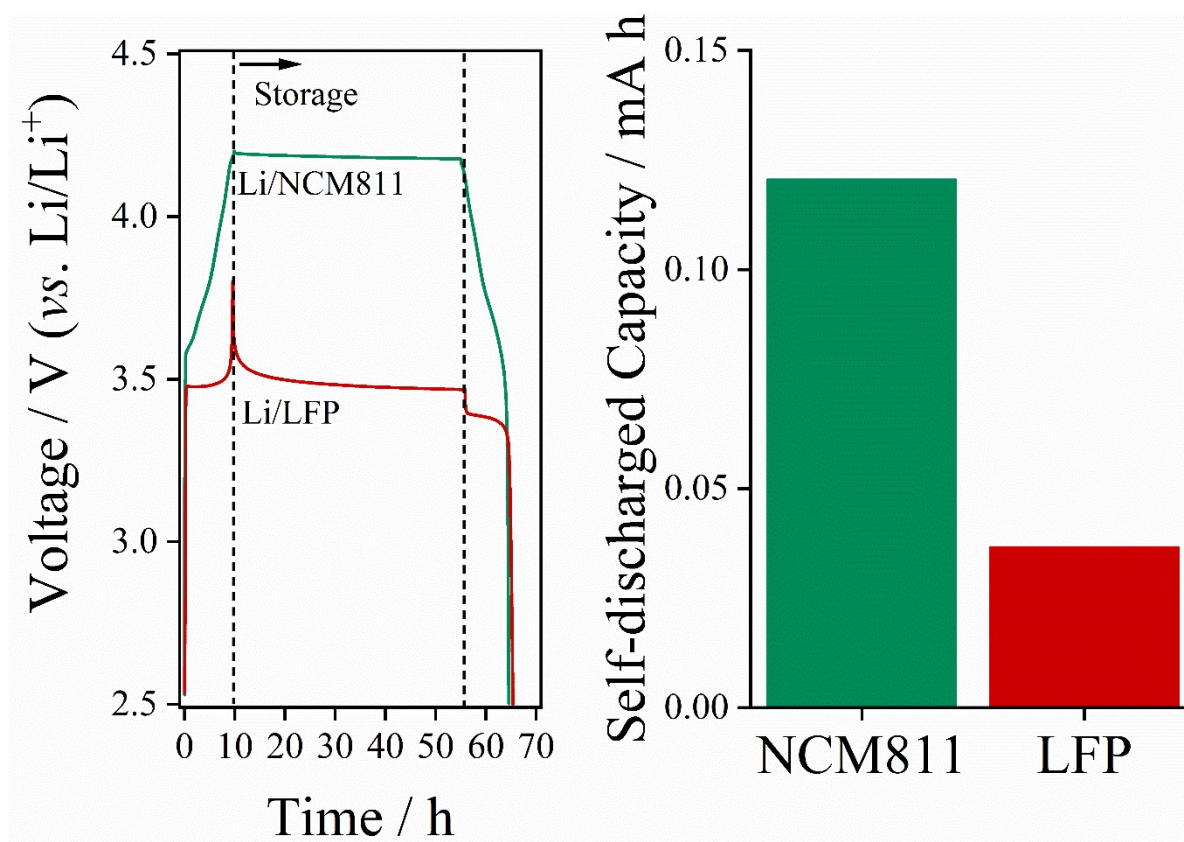

**Figure S2.** time vs. voltage curves during storage test of Li/NCM811 and Li/LFP cells and the calculated irreversible capacities of Li/NCM811 and Li/LFP cell, respectively. The storage was conducted with SOC 100 at 25 °C chamber

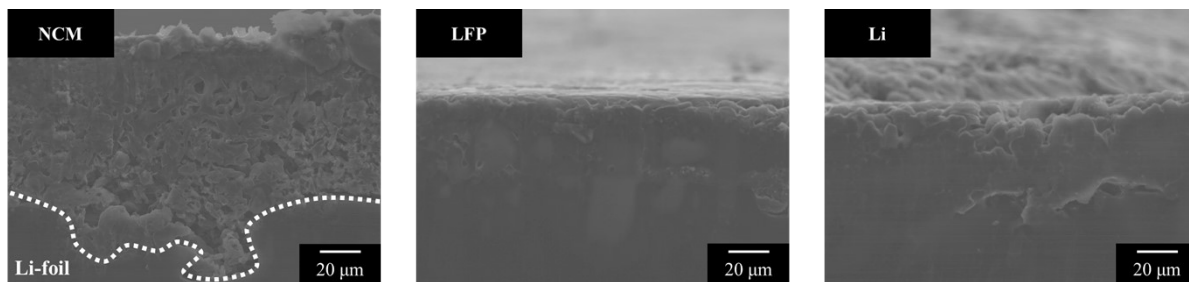

**Figure S3.** Cross-sectional SEM images from the 5<sup>th</sup> cycled Li electrode with Li, LFP, NCM811 counter electrodes, respectively.

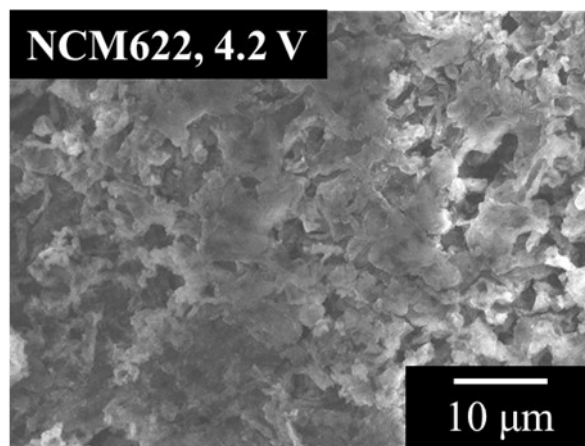

**Figure S4.** SEM image of 5<sup>th</sup> cycled Li electrode with NCM622 counter electrode.

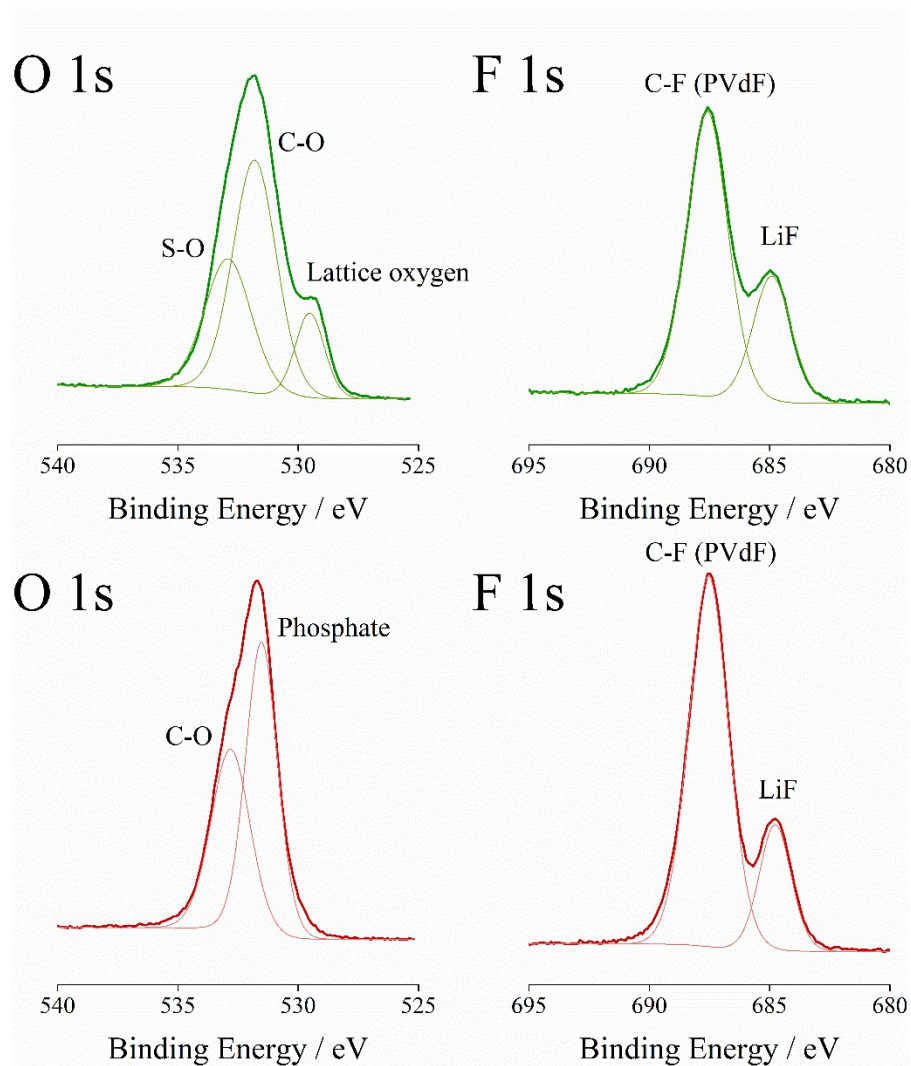

**Figure S5.** Post-mortem O 1s and F 1s XPS spectra obtained from the positive electrodes of (a) Li/NCM811 and (b) Li/LFP cells.

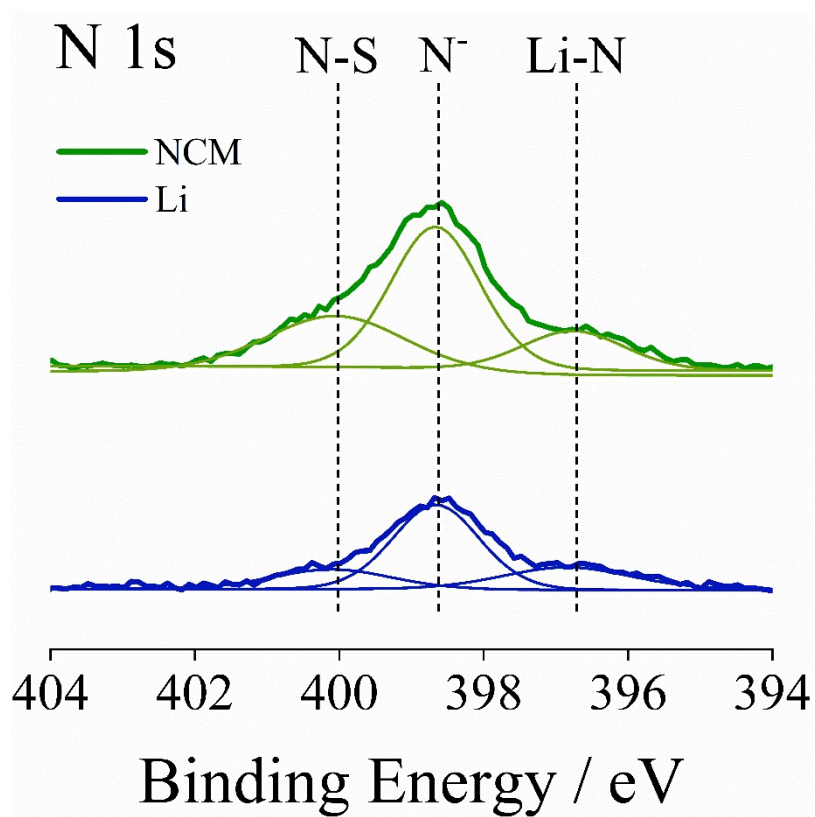

**Figure S6.** N 1s spectra obtained from the 5<sup>th</sup> cycled Li metals with Li/NCM811 and Li/Li cells.

XPS references are from the *Sci. Rep.*, 2016, 6, 21771, *Sci. Rep.*, 2017, 7, 15925, *ACS Energy*

*Lett.*, 2019, 4, 411-41

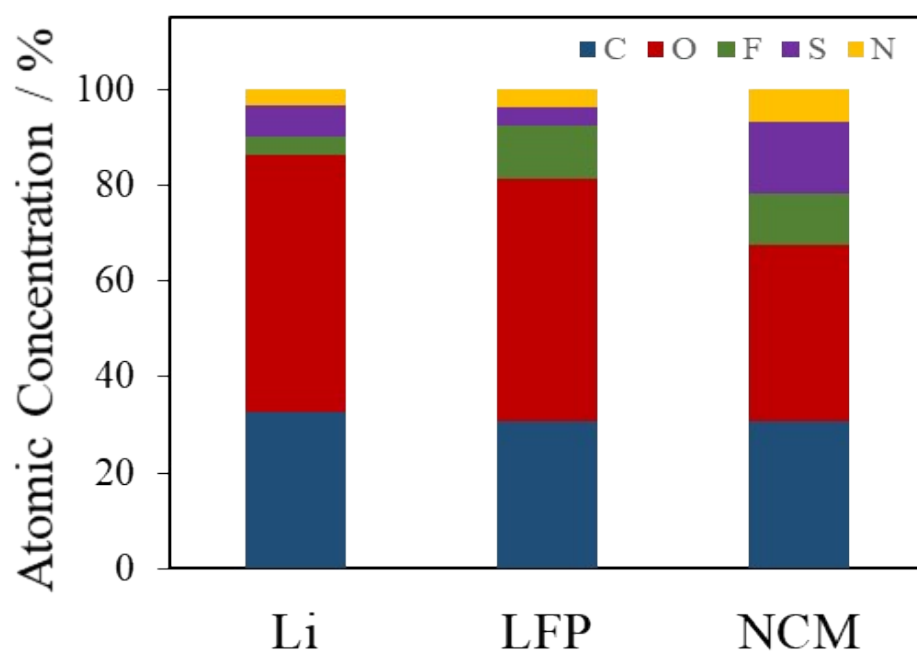

**Figure S7.** Atomic concentration of the SEI film on the Li metal obtained from 5<sup>th</sup> cycled Li/Li, Li/LFP and Li/NCM811 cell.



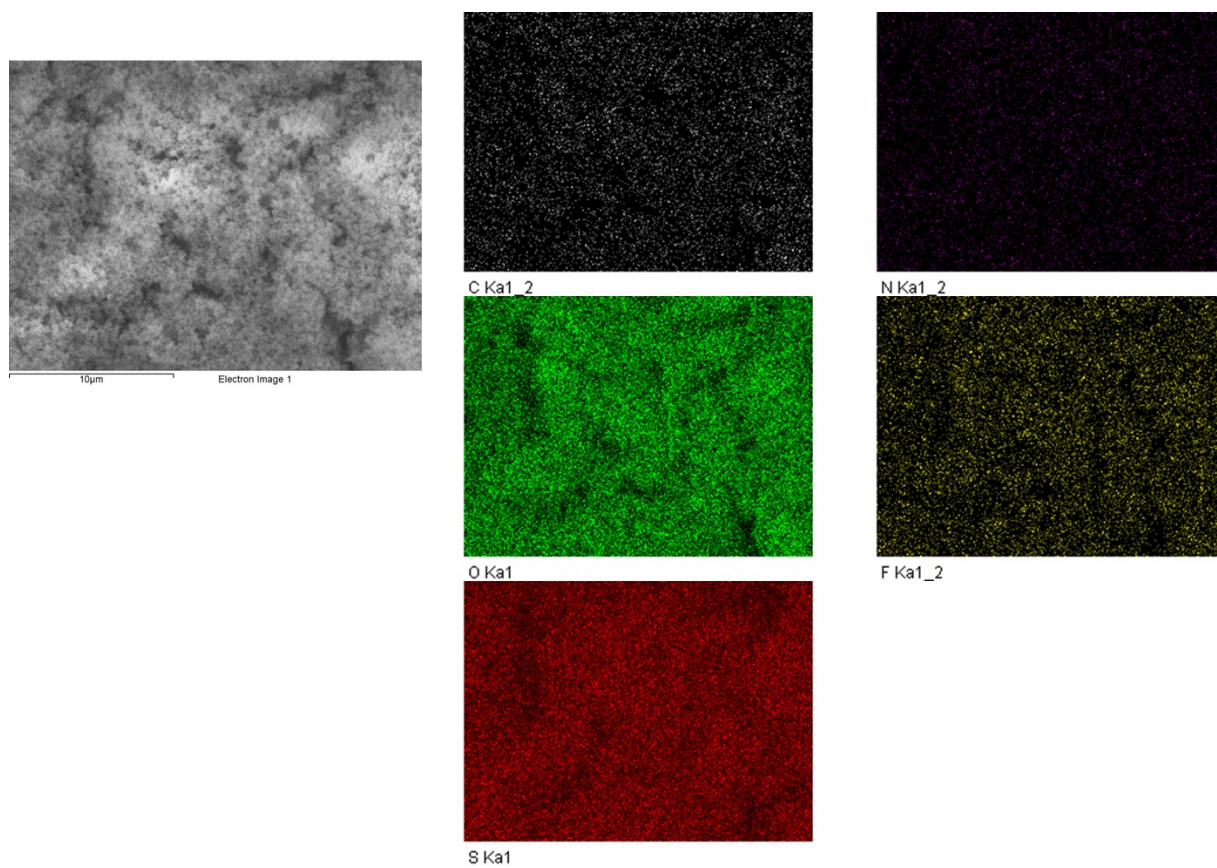

**Figure S8.** EDS map obtained from the 5<sup>th</sup> cycled Li metals at Li/Li symmetric cell comprising the stored electrolyte with 4.2 V charged NCM811 electrodes

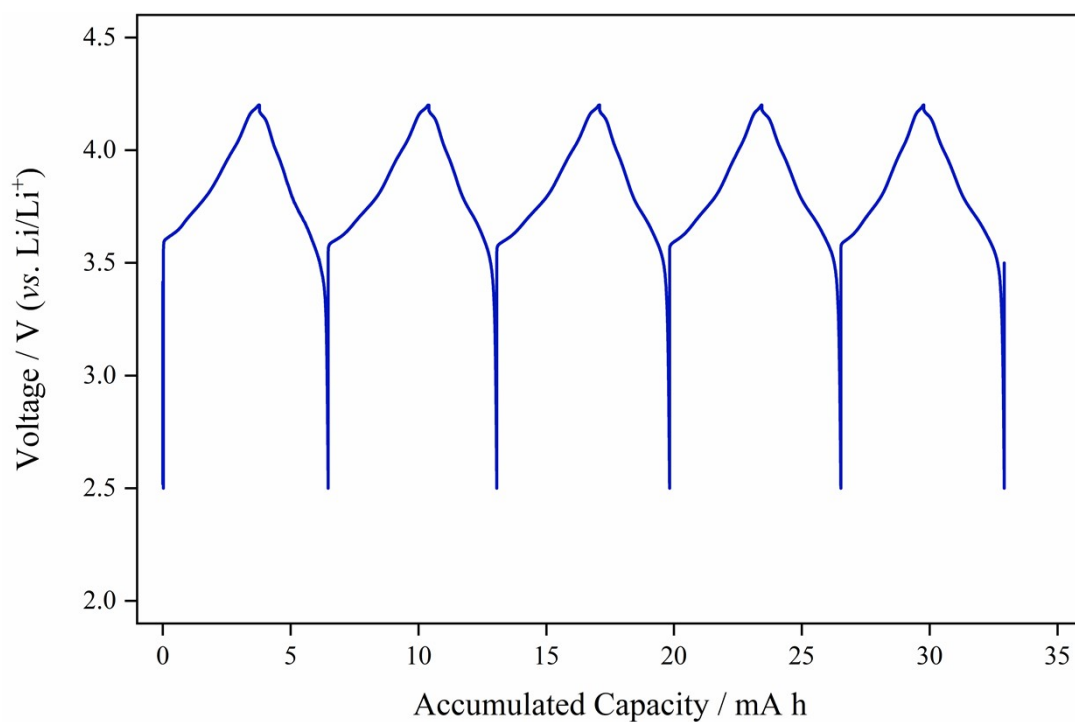

**Figure S9.** Capacity vs. voltage curves recorded from the reassembled fresh Li and electrolyte comprised Li/pre-cycled NCM811 cell.

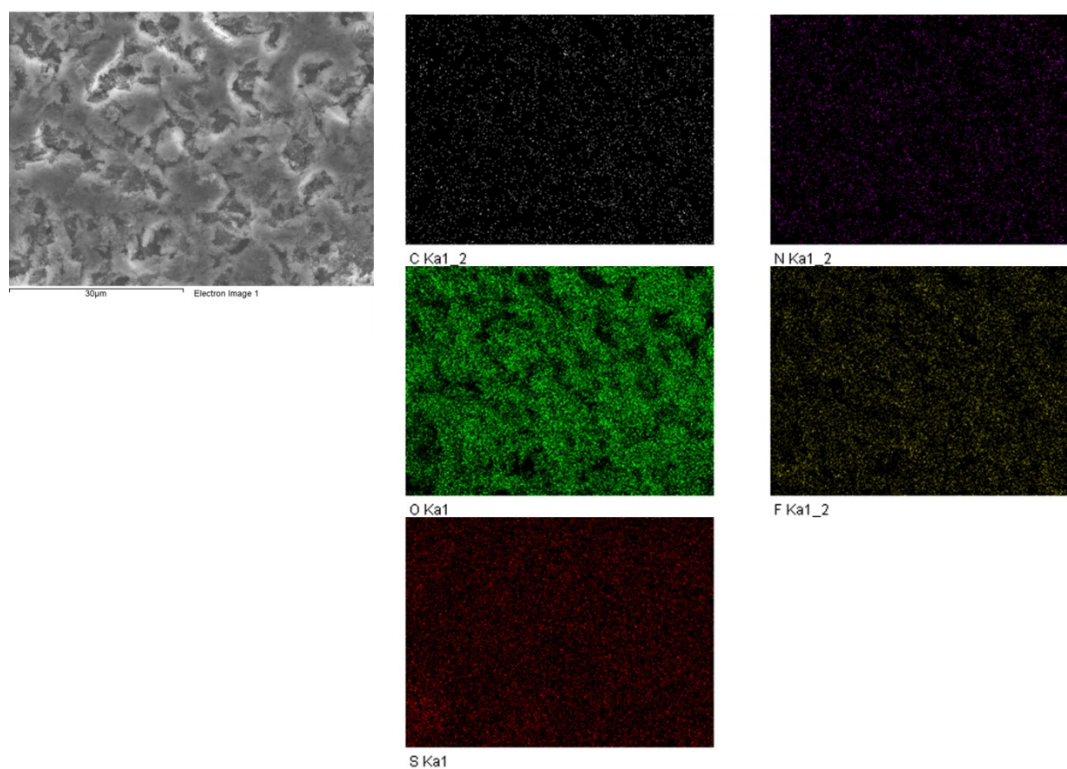

**Figure S10.** EDS map obtained from the 5<sup>th</sup> cycled Li metals with Li/pre-cycled NCM811 electrode comprised cell

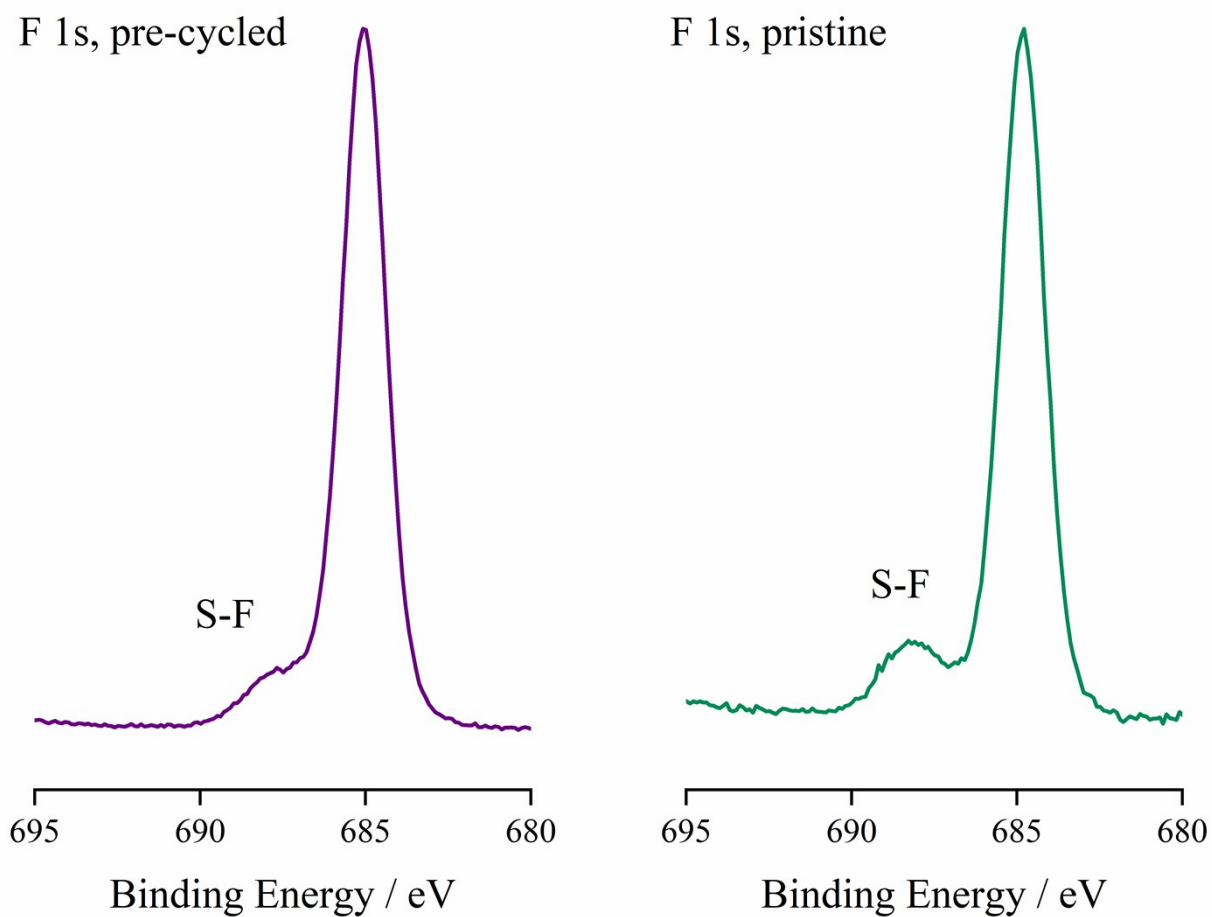

**Figure S11.** F 1s spectra obtained from the 5<sup>th</sup> cycled Li metals with Li/pre-cycled NCM811 and Li/NCM811 cells

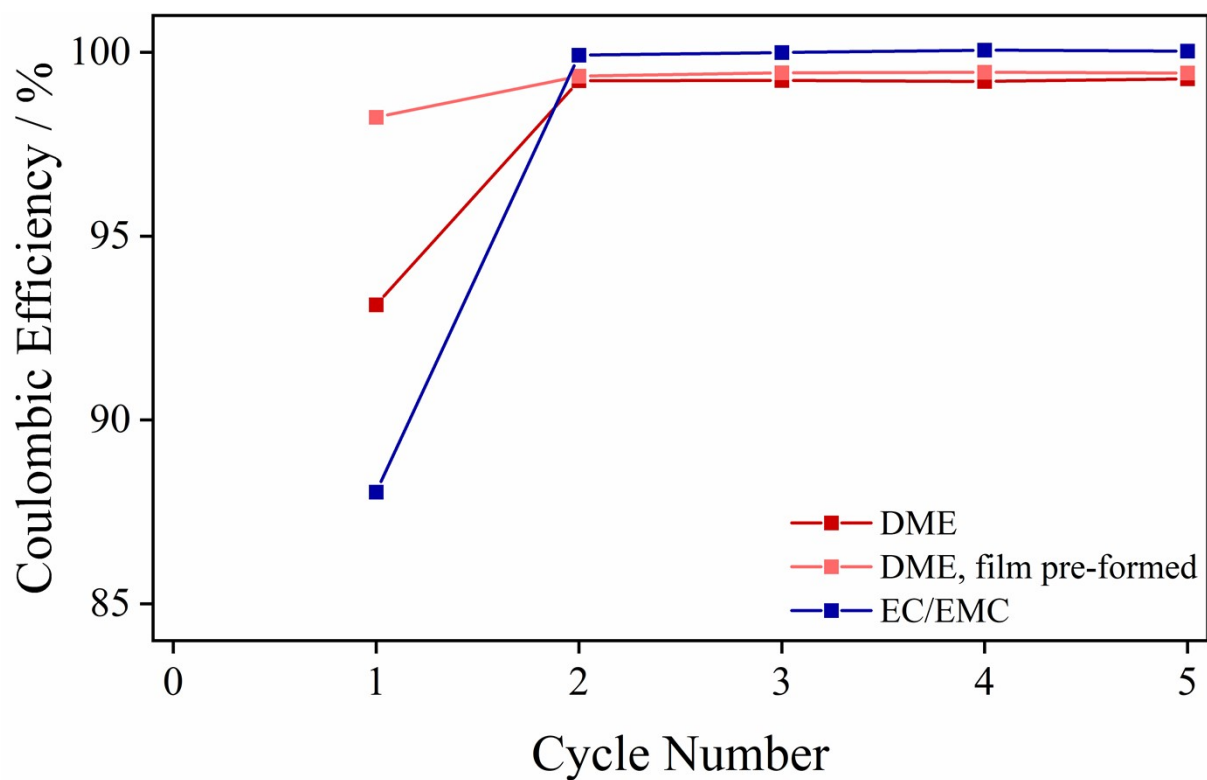

**Figure S12.** Coulombic efficiency obtained from 2.0 M LiFSI in DME electrolyte with pristine NCM811 and pre-film formed NCM811 electrode and 1.0 M LiPF<sub>6</sub> in EC/EMC (3:7 = v/v) electrolyte injected pristine NCM electrode with Li/NCM cell configuration at 0.1 C with 2.5 to 4.2 V (vs. Li/Li<sup>+</sup>) voltage range

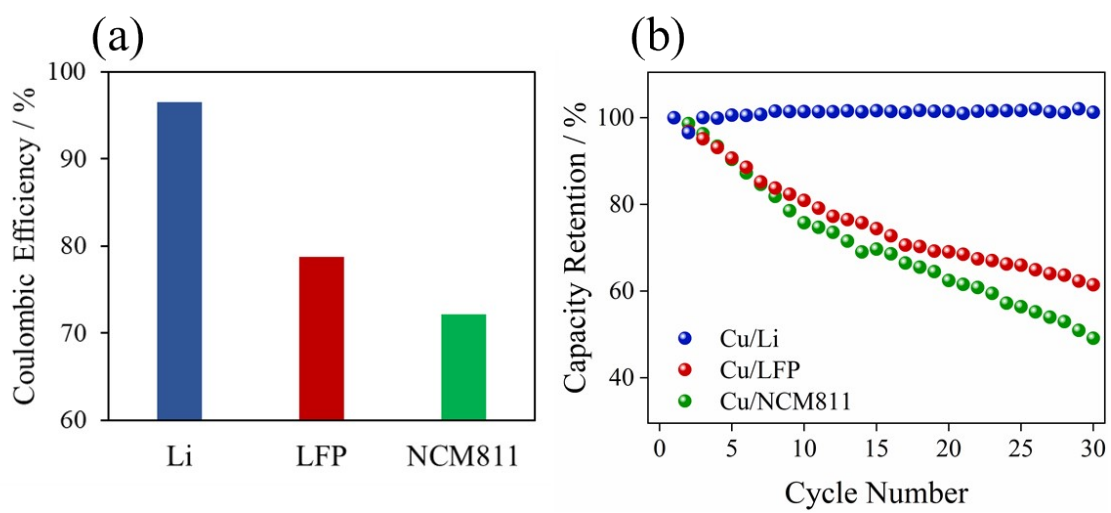

**Figure S13.** (a) Initial Coulombic efficiency and (b) cycleability obtained from the Cu/Li, Cu/LFP and Cu/NCM811 cells

**Table S1.** Atomic percent of Ni and Fe from the EDS analysis from the cycled Li from Li/NCM and Li/LFP cells.

|    | Li from Li/NCM cell / at. % | Li from Li/LFP / at. % |
|----|-----------------------------|------------------------|
| Ni | -0.01                       |                        |
| Fe |                             | 0.01                   |
